# Supplementary material
Source: PubMed Central journal article supplement (PMC8258063)
Supplement: bmjnph-2021-000269supp001.pdf [file bmjnph-2021-000269supp001.pdf]

## SUPPLEMENTARY MATERIAL

Table S1: Clinical presentation and analytical results according to smoking status.

| SYMPTOMS n (%)                                                                                                                                                                                                                                                                                                                                  | Smoker N=307   | Ex-smoker N=934 | Non-smoker N=3983 | p value |
|-------------------------------------------------------------------------------------------------------------------------------------------------------------------------------------------------------------------------------------------------------------------------------------------------------------------------------------------------|----------------|-----------------|-------------------|---------|
| Asymptomatic                                                                                                                                                                                                                                                                                                                                    | 35 (11.4) † *  | 35 (3.8)        | 189 (4.8)         | p<0.001 |
| Mild dyspnoea                                                                                                                                                                                                                                                                                                                                   | 66 (21.5)      | 243 (26.0)      | 1078 (27.1) ¥     |         |
| Moderate dyspnoea                                                                                                                                                                                                                                                                                                                               | 54 (17.6)      | 207 (22.2)      | 794 (19.9)        |         |
| Severe dyspnoea                                                                                                                                                                                                                                                                                                                                 | 29 (9.4)       | 123 (13.2) *    | 346 (8.7)         |         |
| Tachypnoea                                                                                                                                                                                                                                                                                                                                      | 73 (24.3)      | 301 (33.7) * ¥  | 1004 (26.1)       | p<0.001 |
| Fatigue                                                                                                                                                                                                                                                                                                                                         | 126 (42.1)     | 444 (49.6) ¥    | 1797 (46.4)       | p=0.059 |
| Anosmia                                                                                                                                                                                                                                                                                                                                         | 49 (16.7) † *  | 47 (5.5)        | 261 (7.0)         | p<0.001 |
| Disgeusia                                                                                                                                                                                                                                                                                                                                       | 53 (18.0) † *  | 50 (5.8)        | 280 (7.5)         | p<0.001 |
| Sore throat                                                                                                                                                                                                                                                                                                                                     | 46 (15.6) †    | 79 (9.1)        | 471 (12.5) †      | p=0.003 |
| Fever                                                                                                                                                                                                                                                                                                                                           | 222 (73.0)     | 722 (78.6) ¥    | 3164 (80.3) ¥     | p=0.007 |
| Cough                                                                                                                                                                                                                                                                                                                                           | 200 (65.6)     | 623 (68.2)      | 2664 (67.8)       | p=0.681 |
| Vomiting                                                                                                                                                                                                                                                                                                                                        | 18 (6.0)       | 55 (6.1)        | 312 (8.1) †       | p=0.074 |
| Diarrhea                                                                                                                                                                                                                                                                                                                                        | 56 (18.7)      | 171 (19.1)      | 751 (19.5)        | p=0.920 |
| Myalgia                                                                                                                                                                                                                                                                                                                                         | 87 (28.8)      | 265 (29.7)      | 1288 (33.5) †     | p=0.035 |
| Oxygen saturation<92%                                                                                                                                                                                                                                                                                                                           | 96 (31.9)      | 408 (45.0) * ¥  | 1309 (34.0)       | p<0.001 |
| <b>ANALYTICAL RESULTS</b>                                                                                                                                                                                                                                                                                                                       |                |                 |                   |         |
| Elevated Ddimer                                                                                                                                                                                                                                                                                                                                 | 155 (57.4)     | 583 (72.4) * ¥  | 2129 (62.9)       | p<0.001 |
| Elevated procalcitonin                                                                                                                                                                                                                                                                                                                          | 58 (24.7)      | 187 (28.4) *    | 567 (19.7)        | p<0.001 |
| Elevated CRP                                                                                                                                                                                                                                                                                                                                    | 253 (85.8)     | 839 (93.0) * ¥  | 3406 (88.4)       | p<0.001 |
| Elevated troponin                                                                                                                                                                                                                                                                                                                               | 52 (27.8) † *  | 73 (17.2) *     | 255 (12.4)        | p<0.001 |
| Elevated transaminases                                                                                                                                                                                                                                                                                                                          | 106 (37.7)     | 350 (41.3)      | 1463 (40.2)       | p=0.573 |
| Elevated ferritine                                                                                                                                                                                                                                                                                                                              | 89 (47.3)      | 315 (62.6) ¥    | 1276 (59.3) ¥     | p=0.001 |
| Elevated triglycerides                                                                                                                                                                                                                                                                                                                          | 52 (29.5)      | 80 (19.5) ¥     | 361 (19.8) ¥      | p=0.008 |
| Elevated LDH                                                                                                                                                                                                                                                                                                                                    | 153 (55.6) † * | 630 (75.8)      | 2520 (71.8) †     | p<0.001 |
| Creatinine >1,5                                                                                                                                                                                                                                                                                                                                 | 82 (27.6)      | 188 (20.8) ¥    | 479 (12.5) † ¥    | p<0.001 |
| Lymphocytes <1500                                                                                                                                                                                                                                                                                                                               | 160 (54.6) † * | 728 (82.4)      | 2972 (77.9) †     | p<0.001 |
| Hemoglobin<12 gr/dl                                                                                                                                                                                                                                                                                                                             | 97 (32.3)      | 241 (26.8)      | 991 (25.7) ¥      | p=0.040 |
| Platelets<150000                                                                                                                                                                                                                                                                                                                                | 81 (27.1)      | 271 (30.0)      | 918 (23.8) †      | p<0.001 |
| <i>LDH; lactate dehydrogenase. CRP; C reactive protein. HB; hemoglobin. CR; creatinine. TN; troponin. Values are n (%). All p values were determined by using an analysis of variance with Bonferroni method. * p &lt; 0.05 compared to non-smoker subjects. † p &lt; 0.05 compared to ex-smokers. ¥ p&lt;0.05 compared to smoker subjects.</i> |                |                 |                   |         |

**Table S2: Treatment during in-hospital stay.**

| <b>IN-HOSPITAL MANAGEMENT</b>                                                                                                                                                                                                                  |               |                  |                   |                   |
|------------------------------------------------------------------------------------------------------------------------------------------------------------------------------------------------------------------------------------------------|---------------|------------------|-------------------|-------------------|
| <b>OXYGEN THERAPY<br/>n (%)</b>                                                                                                                                                                                                                | <b>Smoker</b> | <b>Ex-Smoker</b> | <b>Non-smoker</b> | <b>p value</b>    |
| O <sub>2</sub> at the admission                                                                                                                                                                                                                | 186 (61.0)    | 740 (81.3) * ¥   | 2744 (69.8) ¥     | <b>p&lt;0.001</b> |
| High flow nasal cannula                                                                                                                                                                                                                        | 72 (23.8) *   | 199 (22.1) *     | 723 (18.7)        | <b>p=0.013</b>    |
| Non-invasive mechanical ventilation                                                                                                                                                                                                            | 43 (14.1)     | 159 (17.5) *     | 486 (12.5)        | <b>p&lt;0.001</b> |
| Invasive mechanical ventilation                                                                                                                                                                                                                | 26 (8.6)      | 91 (10.1) *      | 277 (7.2)         | <b>p=0.009</b>    |
| Prone position                                                                                                                                                                                                                                 | 22 (7.4)      | 136 (15.1) * ¥   | 374 (9.7)         | <b>p&lt;0.001</b> |
| Circulatory support or ECMO                                                                                                                                                                                                                    | 13 (4.3)      | 61 (6.8) *       | 167 (4.3)         | <b>p=0.007</b>    |
| <b>OTHER THERAPIES<br/>DURING THE ADMISSION,<br/>n (%)</b>                                                                                                                                                                                     |               |                  |                   |                   |
| Use of glucocorticoids                                                                                                                                                                                                                         | 75 (25.2)     | 328 (36.4) * ¥   | 1028 (26.5)       | <b>p&lt;0.001</b> |
| Use of hydroxychloroquine                                                                                                                                                                                                                      | 256 (85.0)    | 794 (87.2) *     | 3296 (83.8)       | <b>p=0.04</b>     |
| Use of antiviral drugs                                                                                                                                                                                                                         | 189 (62.6)    | 566 (62.2)       | 2299 (58.7)       | p=0.08            |
| Use of interferon                                                                                                                                                                                                                              | 80 (26.8) † * | 144 (16.1) *     | 451 (11.7)        | <b>p&lt;0.001</b> |
| Use of tocilizumab                                                                                                                                                                                                                             | 26 (8.7)      | 93 (10.4) *      | 317 (8.2)         | p=0.097           |
| Use of antibiotics                                                                                                                                                                                                                             | 210 (72.7)    | 704 (81.3) * ¥   | 2831 (75.8)       | <b>p=0.001</b>    |
| Use of ACEI /ARBs                                                                                                                                                                                                                              | 75 (25.0) *   | 232 (26.3) *     | 644 (17.0)        | <b>p&lt;0.001</b> |
| Use of anticoagulants                                                                                                                                                                                                                          |               |                  |                   | <b>p&lt;0.001</b> |
| PROFILACTIC                                                                                                                                                                                                                                    | 91 (48.1)     | 319 (58.6) ¥     | 1273 (55.2)       |                   |
| <i>ECMO; extracorporeal membrane oxygenation. ACEI; Angiotensin-converting enzyme inhibitors. ARBs; Angiotensin II receptor blockers.</i>                                                                                                      |               |                  |                   |                   |
| <i>Values are n (%). All p values were determined by using an analysis of variance with Bonferroni method. * p &lt; 0.05 compared to non-smoker subjects. † p &lt; 0.05 compared to ex-smokers. ¥ p &lt; 0.05 compared to smoker subjects.</i> |               |                  |                   |                   |

**Table S3: Complications during in-hospital stay, including ICU admission and Prone position according to age.**

| COMPLICATIONS n (%)       |       | SMOKING STATUS  |                     |                   | p value           |
|---------------------------|-------|-----------------|---------------------|-------------------|-------------------|
|                           |       | Smoker N=307    | Former smoker N=934 | Non-smoker N=3983 |                   |
| Hypotension               |       | 25 (8.5)        | 81 (9.6) *          | 262 (7.2)         | p=0.057           |
| Respiratory insufficiency |       | 140 (46.1)      | 576 (62.8) * ¥      | 1908 (48.5)       | p<0.001           |
| Heart failure             |       | 19 (6.3)        | 104 (11.5) * ¥      | 213 (5.4)         | p<0.001           |
| Renal failure             |       | 57 (18.9) *     | 222 (24.4) * ¥      | 559 (14.3)        | p<0.001           |
| URTI                      |       | 31 (10.3)       | 130 (14.6) *        | 467 (12.1)        | p=0.069           |
| Sepsis                    |       | 71 (23.6) † *   | 132 (14.6) *        | 375 (9.6)         | p<0.001           |
| SIRS                      |       | 48 (15.9)       | 235 (26.2) * ¥      | 743 (19.1)        | p<0.001           |
| Bilateral pneumonia       |       | 158 (51.5)      | 702 (75.2) * ¥      | 2804 (70.4) ¥     | p<0.001           |
| Unilateral pneumonia      |       | 70 (22.8) † *   | 126 (13.5)          | 635 (15.9)        |                   |
| Relevant bleeding         |       | 12 (4.0)        | 34 (3.8) *          | 92 (2.4)          | p=0.024           |
| Hemoptysis                |       | 14 (4.6) *      | 24 (2.7) *          | 53 (1.4)          | p<0.001           |
| Embolic events            |       | 13 (4.3) *      | 30 (3.3) *          | 66 (1.7)          | p<0.001           |
| Skin rash                 |       | 22 (10.0) † *   | 16 (2.6)            | 61 (2.2)          | p<0.001           |
| <b>ICU ADMISSION</b>      |       | <b>30 (9.9)</b> | <b>82 (8.9)</b>     | <b>230 (5.9)</b>  | <b>p&lt;0.001</b> |
| Age                       | <52   | 7 (8.0)         | 6 (6.7)             | 60 (5.2)          | p=0.45            |
|                           | 52-66 | 18 (15.8)       | 23 (9.9)            | 86 (8.9)          | p=0.06            |
|                           | 66-77 | 3 (4.5)         | 41 (11.8)           | 73 (8.5)          | p=0.07            |
|                           | >77   | 2 (5.4)         | 12 (4.8)            | 11 (1.2)          | <b>p=0.001</b>    |
| <b>PRONE POSITION</b>     |       | <b>22 (7.4)</b> | <b>134 (15.2)</b>   | <b>368 (9.7)</b>  | <b>p&lt;0.001</b> |
| Age                       | <52   | 7 (8)           | 8 (9.3)             | 89 (7.9)          | p=0.89            |
|                           | 52-66 | 6 (5.4)         | 28 (12.6)           | 119 (12.7)        | p=0.07            |
|                           | 66-77 | 6 (9.1)         | 71 (21.2)           | 112 (13.4)        | <b>p=0.001</b>    |
|                           | >77   | 3 (9.1)         | 27 (11.2)           | 48 (5.3)          | <b>p=0.04</b>     |

*SIRS: systemic inflammatory response syndrome; URTI: upper respiratory tract infection. Hypotension: systolic pressure <90 mmHg. Values are n (%). P values were determined by using an analysis of variance with Bonferroni method. \* p < 0.05 compared to non-smoker subjects. † p < 0.05 compared to ex-smokers. ¥ p<0.05 compared to smoker subjects.*

**Table S4: All-cause in-hospital death according to three different smoking patterns, stratified by age.**

| ALL-CAUSE DEATH n (%) | Smoking status       |                 |                   | P value           |
|-----------------------|----------------------|-----------------|-------------------|-------------------|
|                       | Current smoker N=307 | Ex-smoker N=934 | Non-smoker N=3983 |                   |
| n=1336 <52            | 4 (4.6%)             | 9 (10%)         | 52 (4.5%)         | p=0.06            |
| n=1312 52-66          | 13 (11.4%)           | 28 (12.1%)      | 92 (9.5%)         | p=0.46            |
| n=1276 66-77          | 25 (37.9%)           | 109 (31.4%)     | 161 (18.7%)       | <b>p&lt;0.001</b> |
| n=1217 >77            | 19 (51.4%)           | 129 (52%)       | 418 (44.8%)       | p=0.11            |
| All patients (n=5141) | 61 (20.1%)           | 275 (30%)       | 723 (18.4%)       | <b>p&lt;0.001</b> |

**Table S5. All-cause in-hospital mortality and the combined endpoint (ICU admission, prone, death).**

| IN-HOSPITAL OUTCOMES n (%)                                  | Current smoker and former smoker n=1241 | Non-smoker n=3983 | p value           |
|-------------------------------------------------------------|-----------------------------------------|-------------------|-------------------|
| <b>ALL-CAUSE DEATH /5224</b>                                | 343 (27.6)                              | 734 (18.4)        | <b>p&lt;0.001</b> |
| <b>ICU ADMISSION</b>                                        | 114 (9.2)                               | 234 (5.9)         | <b>p&lt;0.001</b> |
| <b>PRONE POSITION</b>                                       | 158 (13.2)                              | 374 (9.7)         | <b>p=0.001</b>    |
| <b>COMBINED ENDPOINT/5100 (Death, prone, ICU admission)</b> | 439 (36.2)                              | 1013 (26.1)       | <b>p&lt;0.001</b> |

**Table S6: Propensity scores for mortality and the combined endpoint. Smokers (current or former) vs. never smokers.**

| <b>Propensity score</b>                                 |           |               |               |
|---------------------------------------------------------|-----------|---------------|---------------|
|                                                         | <b>OR</b> | <b>95% CI</b> | <b>p</b>      |
| <b>All-cause death</b>                                  | 1.04      | 0.99-1.07     | <b>p=0.06</b> |
| <b>Combined endpoint*</b>                               | 1.05      | 1.00-1.10     | <b>p=0.03</b> |
| <i>*all-cause death, prone position, ICU admission.</i> |           |               |               |
